# Supplementary material for: Metal–semiconductor structural phase transitions and antiferromagnetic orderings in (Benzo-TTFVO)2·MX4(M = Fe, Ga; X = Cl, Br) salts
Source: Royal Society of Chemistry journal article supplement (doi:10.1039/b612053a), 2007-01-01
Supplement: b612053a.pdf [file b612053a.pdf]

### Electronic Supplementary information

Manuscript No. B612053A

Title: Metal-semiconductor structural phase transitions and antiferromagnetic orderings in (Benzo-TTFVO)<sub>2</sub>•MX<sub>4</sub> (M = Fe, Ga; X = Cl, Br) salts

**Results on preliminary structure determination at 90 K with cell constants;  $a = 13.00(2)$ ,  $b = 13.82(2)$ ,  $c = 20.11(3)$  Å,  $\alpha = 99.86(5)$ ,  $\beta = 105.13(6)$ ,  $\gamma = 89.97(6)^\circ$ ,  $U = 3430(8)$  Å<sup>3</sup>; and four crystallographically independent donor molecules and two FeBr<sub>4</sub><sup>-</sup> ions.**

**Crystal data for 4<sub>2</sub>•FeBr<sub>4</sub> at 90 K.** C<sub>52</sub>H<sub>24</sub>S<sub>24</sub>O<sub>4</sub>Fe<sub>2</sub>Br<sub>8</sub>,  $M = 2233.13$ , triclinic,  $a = 13.00(2)$ ,  $b = 13.82(2)$ ,  $c = 20.11(3)$  Å,  $\alpha = 99.86(5)$ ,  $\beta = 105.13(6)$ ,  $\gamma = 89.97(6)^\circ$ ,  $U = 3430(8)$  Å<sup>3</sup>,  $T = 90$  K, space group  $P-1$ ,  $Z = 2$ ,  $\mu(\text{Mo } K\alpha) 5.872 \text{ mm}^{-1}$ , 29328 reflections measured, 14663 unique, of which 4690 were used in all calculations [ $F^2 > 2.0\sigma(F^2)$ ]. The final  $R_1$  and  $wR_2$  were 0.089 and 0.100, respectively.

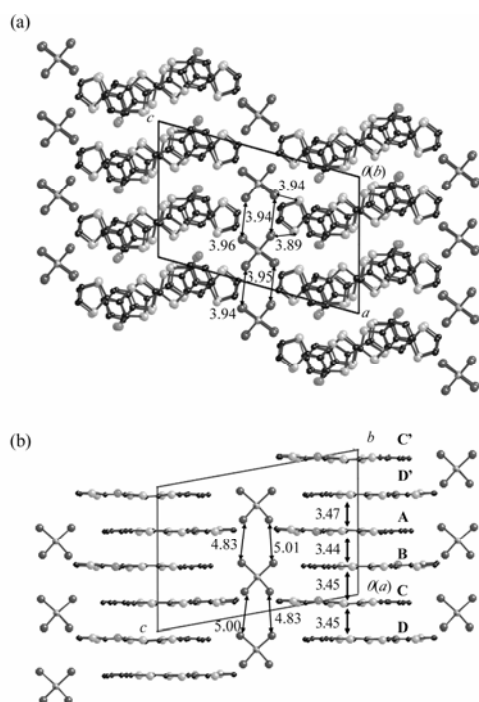

**Fig. 1** Projections of the crystal structure of 4<sub>2</sub>•FeBr<sub>4</sub> at 90 K along the (a) *ac*- and (b) *bc*-planes.

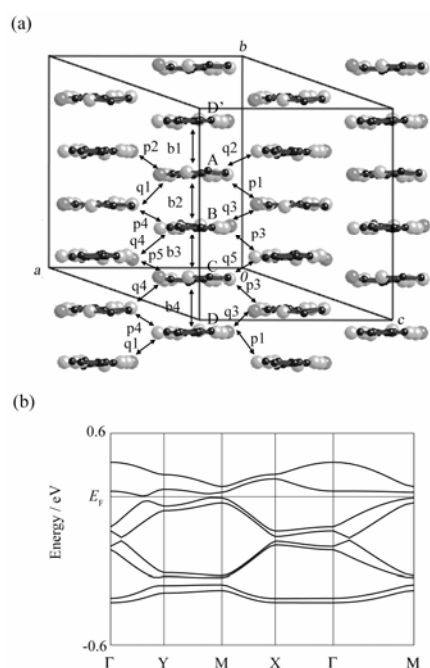

**Fig. 2** (a) Donor array in the  $ab$ -conduction plane and overlap integrals ( $\times 10^{-3}$ ) between neighboring donor molecules in  $4_2\bullet\text{FeBr}_4$  at 90 K:  $q_1 = 2.56$ ,  $q_2 = 0.78$ ,  $q_3 = -3.47$ ,  $q_4 = -1.21$ ,  $q_5 = 0.63$ ,  $p_1 = 2.64$ ,  $p_2 = 3.99$ ,  $p_3 = -1.72$ ,  $p_4 = -0.38$ ,  $p_5 = 1.77$ ,  $b_1 = -21.7$ ,  $b_2 = 17.5$ ,  $b_3 = 13.8$  and  $b_4 = -17.9$ . (b) Band dispersion of  $4_2\bullet\text{FeBr}_4$  at 90 K.
